# Supplementary material for: Bioinformatics strategies for lipidomics analysis: characterization of obesity related hepatic steatosis
Source: Springer Nature journal article supplement (doi:10.1186/1752-0509-1-12), 2007-02-15
Supplement: Additional file 2 [file 1752-0509-1-12-s2.pdf]

# Bioinformatics strategies for lipidomics analysis: characterization of obesity related hepatic steatosis

Laxman Yetukuri<sup>1</sup>, Mikko Katajamaa<sup>2</sup>, Gema Medina-Gomez<sup>3</sup>, Tuulikki Seppänen-Laakso<sup>1</sup>, Antonio Vidal Puig<sup>3</sup> and Matej Orešič<sup>1,\*</sup>

<sup>1</sup>VTT Technical Research Centre of Finland, Tietotie 2, FIN-02044, Espoo, Finland,

<sup>2</sup>Turku Centre for Biotechnology, Tykistökatu 6, FIN-20521, Turku, Finland and

<sup>3</sup>University of Cambridge Department of Clinical Biochemistry, Addenbrooke's Hospital, Hills Road, CB2 2QR, Cambridge, UK

## Additional file 2

Title of data: Table of seed fatty acids

Description of data: The table lists the fatty acids utilized for the lipid scaffold generation

| Seed number | Systematic Name (LIPID MAPS nomenclature) | SMILES representation                    | Score | Total No of Carbons |
|-------------|-------------------------------------------|------------------------------------------|-------|---------------------|
| 1           | decanoyl                                  | <chem>OC(=O)CCCCCCCCC</chem>             | 1     | 10                  |
| 2           | undecanoyl                                | <chem>OC(=O)CCCCCCCCCCC</chem>           | 4     | 11                  |
| 3           | dodecanoyl                                | <chem>OC(=O)CCCCCCCCCCCC</chem>          | 1     | 12                  |
| 4           | tridecanoyl                               | <chem>OC(=O)CCCCCCCCCCCCC</chem>         | 4     | 13                  |
| 5           | tetradecanoyl                             | <chem>OC(=O)CCCCCCCCCCCCC</chem>         | 1     | 14                  |
| 6           | (5-tetradecenoyl)                         | <chem>OC(=O)CCCC=CCCCCCCCC</chem>        | 2     | 14                  |
| 7           | pentadecanoyl                             | <chem>OC(=O)CCCCCCCCCCCCC</chem>         | 4     | 15                  |
| 8           | (6-pentadecenoyl)                         | <chem>OC(=O)CCCC=CCCCCCCCC</chem>        | 4     | 15                  |
| 9           | hexadecanoyl                              | <chem>OC(=O)CCCCCCCCCCCCC</chem>         | 1     | 16                  |
| 10          | (9-hexadecenoyl)                          | <chem>OC(=O)CCCCCCCC=CCCCCCC</chem>      | 1     | 16                  |
| 11          | (7-hexadecenoyl)                          | <chem>OC(=O)CCCCCC=CCCCCCCCC</chem>      | 2     | 16                  |
| 12          | heptadecanoyl                             | <chem>OC(=O)CCCCCCCCCCCCC</chem>         | 4     | 17                  |
| 13          | (10-heptadecenoyl)                        | <chem>OC(=O)CCCCCCCC=CCCCC<br/>C</chem>  | 4     | 17                  |
| 14          | (8-heptadecenoyl)                         | <chem>OC(=O)CCCCCCC=CCCCCCC<br/>C</chem> | 4     | 17                  |
| 15          | octadecanoyl                              | <chem>OC(=O)CCCCCCCCCCCCC<br/>C</chem>   | 1     | 18                  |
| 16          | (9-octadecenoyl)                          | <chem>OC(=O)CCCCCCCC=CCCCC<br/>CC</chem> | 1     | 18                  |

|    |                                 |                                    |   |    |
|----|---------------------------------|------------------------------------|---|----|
| 17 | (11-octadecenoyl)               | OC(=O)CCCCCCCCC=CCCCC<br>CC        | 1 | 18 |
| 18 | (9,12-octadecadienoyl)          | OC(=O)CCCCCCCC=CCC=CCC<br>CCC      | 1 | 18 |
| 19 | (9,12,15-octadecatrienoyl)      | OC(=O)CCCCCCCC=CCC=CCC<br>=CCC     | 1 | 18 |
| 20 | (6,9,12,15-octadecatetraenoyl)  | OC(=O)CCCCC=CCC=CCC=CC<br>C=CCC    | 1 | 18 |
| 21 | nondecenoyl                     | OC(=O)CCCCCCCCCCCCCCCC<br>CC       | 4 | 19 |
| 22 | (10-nondecenoyl)                | OC(=O)CCCCCCCCC=CCCCC<br>CCC       | 4 | 19 |
| 23 | (12-nondecenoyl)                | OC(=O)CCCCCCCCCCCC=CCCC<br>CCC     | 4 | 19 |
| 24 | (10,13-nondecadienoyl)          | OC(=O)CCCCCCCCC=CCC=CC<br>CCCC     | 4 | 19 |
| 25 | (10,13,16-nondecatrienoyl)      | OC(=O)CCCCCCCCC=CCC=CC<br>C=CCC    | 4 | 19 |
| 26 | (7,10,13,16-nondecetetraenoyl)  | OC(=O)CCCCCC=CCC=CCC=C<br>CC=CCC   | 4 | 19 |
| 27 | eicosanoyl                      | OC(=O)CCCCCCCCCCCCCCCC<br>CCC      | 1 | 20 |
| 28 | (11-eicosenoyl)                 | OC(=O)CCCCCCCCC=CCCCC<br>CCCC      | 1 | 20 |
| 29 | (13-eicosenoyl)                 | OC(=O)CCCCCCCCCCCC=CCC<br>CCCC     | 2 | 20 |
| 30 | (11,14-eicosadienoyl)           | OC(=O)CCCCCCCCC=CCC=C<br>CCCCC     | 2 | 20 |
| 31 | (8,11,14-eicosetrienoyl)        | OC(=O)CCCCC=CCC=CCC=<br>CCCCC      | 1 | 20 |
| 32 | (5,8,11,14-eicosetetraenoyl)    | OC(=O)CCCC=CCC=CCC=CCC<br>=CCCCC   | 1 | 20 |
| 33 | (5,8,11,14,17-eicosepentaenoyl) | OC(=O)CCCC=CCC=CCC=CCC<br>=CCC=CCC | 1 | 20 |
| 34 | heneicosanoyl                   | OC(=O)CCCCCCCCCCCCCCCC<br>CCCC     | 4 | 21 |
| 35 | (12-heneicosenoyl)              | OC(=O)CCCCCCCCCCCC=CCCC<br>CCCCC   | 4 | 21 |
| 36 | (14-heneicosenoyl)              | OC(=O)CCCCCCCCCCCC=CC              | 4 | 21 |

|    |                                    |                                        |   |    |
|----|------------------------------------|----------------------------------------|---|----|
|    |                                    | CCCCC                                  |   |    |
| 37 | (12,15-heneicosadienoyl)           | OC(=O)CCCCCCCCCCC=CCC=CCCCC            | 4 | 21 |
| 38 | (9,12,15-heneicosatrienoyl)        | OC(=O)CCCCCCCC=CCC=CCC=CCCCC           | 4 | 21 |
| 39 | (6,9,12,15-heneicosetetraenoyl)    | OC(=O)CCCCC=CCC=CCC=CC=CCCCC           | 4 | 21 |
| 40 | (6,9,12,15,18-heneicosapentaenoyl) | OC(=O)CCCCC=CCC=CCC=CC=CCC=CCC         | 4 | 21 |
| 41 | docosanoyl                         | OC(=O)CCCCCCCCCCCCCCCCCCCCCCCC         | 1 | 22 |
| 42 | (13-docosenoyl)                    | OC(=O)CCCCCCCCCCCCC=CCCCCCCC           | 1 | 22 |
| 43 | (13,16-docosadienoyl)              | OC(=O)CCCCCCCCCCCCC=CCC=CCCCCCC        | 2 | 22 |
| 44 | (13,16,19-docosatrienoyl)          | OC(=O)CCCCCCCCCCCCC=CCC=CCC=CCC        | 2 | 22 |
| 45 | (10,13,16,19-docosatetraenoyl)     | OC(=O)CCCCCCCCC=CCC=CC=CCC=CCC         | 2 | 22 |
| 46 | (7,10,13,16,19-docosapentaenoyl)   | OC(=O)CCCCC=CCC=CCC=C=CC=CCC=CCC       | 1 | 22 |
| 47 | (4,7,10,13,16,19-docosahexaenoyl)  | OC(=O)CCC=CCC=CCC=CCC=CCC=CCC=CCC      | 1 | 22 |
| 48 | tricosanoyl                        | OC(=O)CCCCCCCCCCCCCCCCCCCCCCCC         | 4 | 23 |
| 49 | (14-tricosenoyl)                   | OC(=O)CCCCCCCCCCCCC=CCCCCCCC           | 4 | 23 |
| 50 | (14,17-tricosadienoyl)             | OC(=O)CCCCCCCCCCCCC=CC=CCCCCCC         | 4 | 23 |
| 51 | (14,17,20-tricosatrienoyl)         | OC(=O)CCCCCCCCCCCCC=CC=CCC=CCC         | 4 | 23 |
| 52 | (11,14,17,20-tricosatetraenoyl)    | OC(=O)CCCCCCCCC=CCC=C=CC=CCC=CCC       | 4 | 23 |
| 53 | (8,11,14,17,20-tricosapentaenoyl)  | OC(=O)CCCCC=CCC=CCC=CCC=CCC=CCC=CCC    | 4 | 23 |
| 54 | (5,8,11,14,17,20-tricosahexaenoyl) | OC(=O)CCCC=CCC=CCC=CCC=CCC=CCC=CCC=CCC | 4 | 23 |
| 55 | tetracosanoyl                      | OC(=O)CCCCCCCCCCCCCCCCCCCCCCCC         | 1 | 24 |

|    |                                       |                                          |   |    |
|----|---------------------------------------|------------------------------------------|---|----|
| 56 | (15-tetracosenoyl)                    | OC(=O)CCCCCCCCCCCCCCC=C<br>CCCCCCCC      | 1 | 24 |
| 57 | (15,18-tetracosadienoyl)              | OC(=O)CCCCCCCCCCCCCCC=C<br>CC=CCCCC      | 2 | 24 |
| 58 | (15,18,21-tetracosatrienoyl)          | OC(=O)CCCCCCCCCCCCCCC=C<br>CC=CCC=CCC    | 2 | 24 |
| 59 | (12,15,18,21-tetracosatetraenoyl)     | OC(=O)CCCCCCCCCCC=CCC=<br>CCC=CCC=CCC    | 2 | 24 |
| 60 | (9,12,15,18,21-tetracosapentaenoyl)   | OC(=O)CCCCCCCC=CCC=CCC<br>=CCC=CCC=CCC   | 2 | 24 |
| 61 | (6,9,12,15,18,21-tetracosahexaenoyl)  | OC(=O)CCCCC=CCC=CCC=CC<br>C=CCC=CCC=CCC  | 2 | 24 |
| 62 | pentacosanoyl                         | OC(=O)CCCCCCCCCCCCCCCC<br>CCCCCCCC       | 4 | 25 |
| 63 | (16-pentacosenoyl)                    | OC(=O)CCCCCCCCCCCCCCCC=C<br>CCCCCCCC     | 4 | 25 |
| 64 | (16,19-pentacosadienoyl)              | OC(=O)CCCCCCCCCCCCCCCC=C<br>CCC=CCCCC    | 4 | 25 |
| 65 | (16,19,22-pentacosatrienoyl)          | OC(=O)CCCCCCCCCCCCCCCC=C<br>CCC=CCC=CCC  | 4 | 25 |
| 66 | (13,16,19,22-pentacosatetraenoyl)     | OC(=O)CCCCCCCCCCC=CCC<br>=CCC=CCC=CCC    | 4 | 25 |
| 67 | (10,13,16,19,22-pentacosapentaenoyl)  | OC(=O)CCCCCCCC=CCC=CC<br>C=CCC=CCC=CCC   | 4 | 25 |
| 68 | (7,10,13,16,19,22-pentacosahexaenoyl) | OC(=O)CCCCCC=CCC=CCC=C<br>CC=CCC=CCC=CCC | 4 | 25 |
| 69 | hexacosanoyl                          | OC(=O)CCCCCCCCCCCCCCCC<br>CCCCCCCC       | 2 | 26 |
| 70 | (17-hexacosenoyl)                     | OC(=O)CCCCCCCCCCCCCCCC<br>=CCCCCCCC      | 2 | 26 |
| 71 | (17,20-hexacosadienoyl)               | OC(=O)CCCCCCCCCCCCCCCC<br>=CCC=CCCCC     | 2 | 26 |
| 72 | (17,20,23-hexacosatrienoyl)           | OC(=O)CCCCCCCCCCCCCCCC<br>=CCC=CCC=CCC   | 2 | 26 |
| 73 | (14,17,20,23-hexacosatetraenoyl)      | OC(=O)CCCCCCCCCCCCC=CC<br>C=CCC=CCC=CCC  | 2 | 26 |
| 74 | (11,14,17,20,23-hexacosapentaenoyl)   | OC(=O)CCCCCCCCC=CCC=C<br>CC=CCC=CCC=CCC  | 2 | 26 |
| 75 | (8,11,14,17,20,23-                    | OC(=O)CCCCCCC=CCC=CCC=<br>CCCCCCCC       | 2 | 26 |

|    |                                           |                                            |   |    |
|----|-------------------------------------------|--------------------------------------------|---|----|
|    | hexacosahexaenoyl)                        | CCC=CCC=CCC=CCC                            |   |    |
| 76 | heptacosanoyl                             | OC(=O)CCCCCCCCCCCCCCCCC<br>CCCCCCCCC       | 4 | 27 |
| 77 | (18-heptaacosenoyl)                       | OC(=O)CCCCCCCCCCCCCCCCC<br>C=CCCCCCCCC     | 4 | 27 |
| 78 | (18,21-heptacosadienoyl)                  | OC(=O)CCCCCCCCCCCCCCCCC<br>C=CCC=CCCCCC    | 4 | 27 |
| 79 | (18,21,24-heptacosatrienoyl)              | OC(=O)CCCCCCCCCCCCCCCCC<br>C=CCC=CCC=CCC   | 4 | 27 |
| 80 | (15,18,21,24-heptacosatetraenoyl)         | OC(=O)CCCCCCCCCCCCCCC=C<br>CC=CCC=CCC=CCC  | 4 | 27 |
| 81 | (12,15,18,21,24-<br>heptacosapentaenoyl)  | OC(=O)CCCCCCCCCCC=CCC=<br>CCC=CCC=CCC=CCC  | 4 | 27 |
| 82 | (9,12,15,18,21,24-<br>heptacosahexaenoyl) | OC(=O)CCCCCCCC=CCC=CCC<br>=CCC=CCC=CCC=CCC | 4 | 27 |
